1 **SAPH-ire TFx – A Recommendation-based Machine Learning Model Captures a Broad**  
2 **Feature Landscape Underlying Functional Post-Translational Modifications**

3

4 Short Title: SAPH-ire TFx – a neural network recommendation model and resource for identifying  
5 likely-functional PTMs

6

7 Nolan English<sup>1,2</sup> and Matthew Torres<sup>1,2,\*</sup>

8

9 <sup>1</sup>School of Biological Sciences, Georgia Institute of Technology, Atlanta, GA 30332

10 <sup>2</sup>Quantitative Biosciences Program, Georgia Institute of Technology, Atlanta, GA 30332

11

12

13

14

15

16

17

18

19

20

21

22

23

24

25

26

27

28

29 \* To Whom Correspondence Should be Addressed:

30

31 Matthew Torres

32 Associate Professor

33 School of Biological Sciences

34 Engineered Biosystems Building, 4009

35 Georgia Institute of Technology

36 950 Atlantic Drive

37 Atlanta, Georgia 30332

38 [mtorres35@gatech.edu](mailto:mtorres35@gatech.edu)

39 **ABSTRACT**

40 Protein post-translational modifications (PTMs) are a rapidly expanding feature class of significant  
41 importance in cell biology. Due to a high burden of experimental proof, the number of functional  
42 PTMs in the eukaryotic proteome is currently underestimated. Furthermore, not all PTMs are  
43 functionally equivalent. Therefore, computational approaches that can confidently recommend the  
44 functional potential of experimental PTMs are essential. To address this challenge, we developed  
45 *SAPH-ire TFX* (<https://saphire.biosci.gatech.edu/>): a multi-feature neural network model and web  
46 resource optimized for recommending experimental PTMs with high potential for biological  
47 impact. The model is rigorously benchmarked against independent datasets and alternative  
48 models, exhibiting unmatched performance in the recall of known functional PTM sites and the  
49 recommendation of PTMs that were later confirmed experimentally. An analysis of feature  
50 contributions to model outcome provides further insight on the need for multiple rather than single  
51 features to capture the breadth of functional data in the public domain.

52

53 **Contact:** [mtorres35@gatech.edu](mailto:mtorres35@gatech.edu)

54 **Supplementary Information:** See Tables S1-S6 & Figures S1-S4.

## 55 INTRODUCTION

56 Post-translational modifications (PTMs), chemical or proteinaceous alterations to amino  
57 acid residues in a protein, have the potential to expand the function and regulatory control of  
58 proteins beyond the limits of the genome (Prabakaran et al., 2012). PTMs can act on long or short  
59 timescales that allow for dynamic control and response of a cellular proteome to changing  
60 environments or cellular phases that ultimately shape cellular phenotype, often by modulating  
61 changes in protein interaction, localization, or stability (Csizmok and Forman-Kay, 2018).  
62 Concomitantly, disruption to either the amino acid or modification of highly functional PTM sites  
63 can contribute to cellular dysfunction and disease (Gibson et al., 2010; Reimand et al., 2015;  
64 Reimand and Bader, 2014).

65 The scientific community has witnessed an exponential increase in PTM data over the last  
66 15 years, fueled by high-throughput mass spectrometry that has identified hundreds of different  
67 PTM types occurring on nearly all of the 20 common amino acids. However, the rate at which  
68 PTM data is generated – a parallel process involving hundreds of independent labs – far  
69 surpasses the rate at which it is being curated and/or processed for interpretation – a task  
70 undertaken by a much smaller set of labs and institutions (Chen et al., 2017; Pascovici et al.,  
71 2018). A longstanding question emerging from these efforts is whether all PTMs (*detected*  
72 *accurately*) are functionally important – a question not easily answered due to the high burden of  
73 experimental evidence needed to prove functionality, which involves significant time, cost, and  
74 specific expertise for any given protein. These challenges are compounded by unnecessary  
75 redundancy in experimental effort and the tendency of most labs not to report non-functional  
76 results. Although not as commonly addressed in the literature, lack of PTM-centric user-friendly  
77 visualization and organization tools – with or without computational enhancements – also raises  
78 significant barriers to PTM data accessibility and interpretation. These underlying challenges limit  
79 the view of what are an are not likely important modifications and this tends to promote a  
80 perspective that the study of PTMs is risky and quite possibly not worth the effort.

81 Computational approaches aimed at the functional prioritization, or rank-based sorting, of  
82 PTMs using single PTM site features have made a tangible impact on the discovery of several  
83 new regulatory elements in proteins. Indeed, functional significance of PTM sites that are  
84 evolutionarily conserved – especially across a great phylogenetic distance – have proven to be  
85 more likely functional for the protein families in which they are found (Beltrao et al., 2012; Landry  
86 et al., 2009; Strumillo et al., 2019). Similarly, co-localization was shown to be predictive for co-  
87 regulatory phosphorylation-dependent ubiquitination (Minguez et al., 2015, 2013, 2012). Lastly,  
88 protein structural features such as solvent accessibility or PTM proximity to catalytic residues has  
89 proven to be a useful filter for functional modifications (Dewhurst et al., 2015; Johnson et al.,  
90 2015). Despite these successes, not all PTMs with experimental evidence of function are highly  
91 conserved, co-localized, or are near catalytic pockets or other important protein structures.  
92 Indeed, cases wherein a PTM's potential for function is easily predicted by one of these co-  
93 occurring features alone may be considered “low-hanging fruit”.

94 Machine learning models that incorporate multiple PTM site features have shown promise  
95 in capturing a larger proportion of the functional PTM population in eukaryotes (Ochoa et al.,  
96 2020; Torres et al., 2016; Xiao et al., 2016), and have enabled the identification of functional  
97 PTMs not readily identifiable through single feature analyses alone (Dewhurst and Torres, 2017).  
98 However, most models have limited potential to inform the broad range of functionality likely to  
99 exist across the Eukaryotic kingdom as most exclude all but one type of PTM – usually  
100 phosphorylation – despite the ample evidence of many other regulatory modifications and sites.  
101 Existing models are also rank-based, in which model output places PTMs in a competitive  
102 hierarchy of functional importance. Within these models, PTMs for which functional evidence  
103 already exists end up being broadly distributed in the scoring regime and with only a small fraction  
104 of candidates rising to the top. This severely limits the utility of rank-based methods for identifying  
105 PTMs of putative function as only the most extreme outliers can be confidently chosen.

106 We hypothesize that capturing the breadth of function that exists naturally in biology can  
107 benefit from the use of *inclusive* models that incorporate data from many different PTM types,  
108 PTM site features, and functional consequences. Here we test this hypothesis through the  
109 development, characterization and application of a new machine learning model, SAPH-ire TFX,  
110 and a complimentary interactive web-based resource and API (<https://saphire.biosci.gatech.edu>)  
111 to enable PTM data visualization. The model is recommendation rather than rank based and has  
112 been applied to 512,015 total unique PTMs of which ~12,000 have been validated as functional  
113 *a priori* across 763 eukaryotic organisms. Extension of the results to experimental PTMs of  
114 unknown function suggest that as many as half of them do not exhibit characteristics of functional  
115 PTMs in the public domain.

116

## 117 RESULTS

### 118 SAPH-ire TFX exhibits robust performance on unexposed datasets

119 A detailed description of the SAPH-ire TFX model design and architecture is described  
120 within materials and methods. Conceptually, the model utilizes feature data extracted from  
121 multiple sequence alignment positions that harbor evidence of PTM (called Modified Alignment  
122 Positions or *MAPs*), uses these features as inputs into a neural network trained to recognize  
123 *MAPs* harboring functional PTMs (called *known functional MAPs*) (**Figure 1**). For this study, the  
124 model was developed on an initial dataset compiled in late 2018, consisting of 435,750 total PTMs  
125 of which 9,151 were known functional (the *training dataset*; see materials and methods). We then  
126 evaluated its performance on an expanded PTM dataset in which 102,475 unexposed PTMs  
127 (3,233 known functional) were added to the original set (i.e. the expanded data was not part of  
128 the training nor validation processes employed during model development) (**Figure 2A**).

129 To evaluate performance, we used area under the receiver operating characteristic curve  
130 (ROC AUC), which reports on model accuracy as well as the recall of known functional *MAPs* (i.e.  
131 true positive data). Overall, model performance on the expanded dataset was better than on the

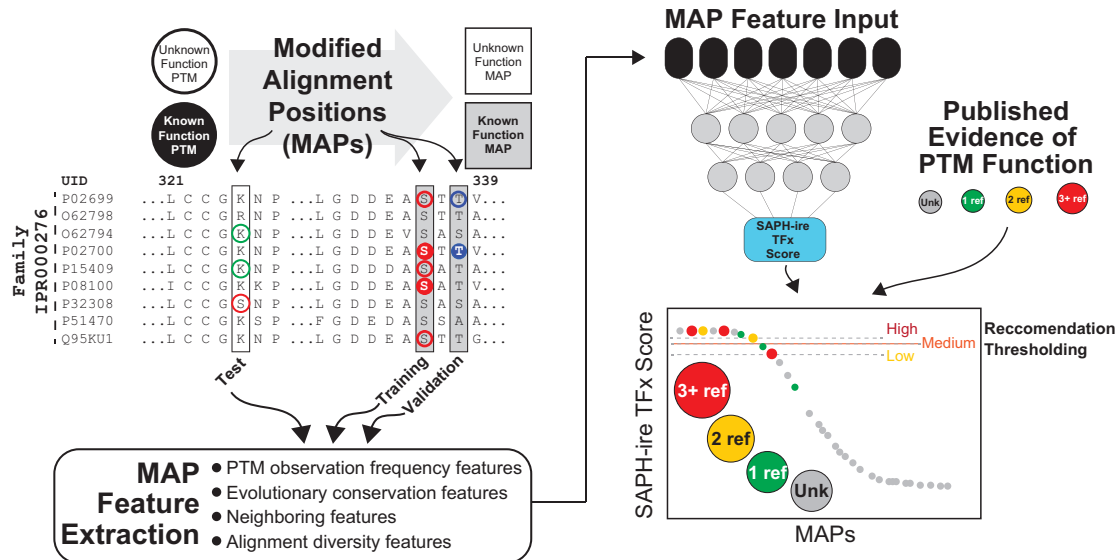

132  
 133 **Figure 1. Schematic diagram of the SAPH-ire TFx methodology.** PTMs of both unknown and known  
 134 functional consequence (as determined through curated public record) are organized by full length protein  
 135 family multiple sequence alignment, creating Modified Alignment Positions (MAPs) of unknown or known  
 136 function. Known function MAPs are used either for model training and/or model validation (via calculation  
 137 of model recall) while unknown function MAPs represent the test cases for which a functional impact is not  
 138 currently known for any of the aligned PTMs. Features are extracted from MAP data and then these features  
 139 used as inputs into a neural network trained to identify known functional MAPs. At this point the model is  
 140 blind to whether a MAP is known or unknown. Each MAP (both known and unknown) passes through the  
 141 model to receive a SAPH-ire TFx output score that ranges from 0 to 1, where 1 indicates a MAP that closely  
 142 resembles a known functional MAP. After scoring, the status of each MAP as known or unknown function  
 143 and the sum of literature sources supporting evidence of function (i.e. the Known Function Source Count)  
 144 is revealed. Model performance is graded and recommendation thresholds generated using recall of known  
 145 function MAPs as a guide.

146  
 147 original training dataset for both metrics ( $AUC_{ROC}$  0.794 and  $AUC_{Recall}$  0.764) (see *materials and*  
 148 *methods*), suggesting that the addition of new data did not diminish performance (**Figure 2B**).

149 Next, we evaluated the model outcome score distributions for unknown and known functional  
 150 MAPs. MAPs were first binned by known function source count (KFSC) – a count of the unique  
 151 literature sources containing evidence of functional impact for a PTM within the MAP (not included  
 152 as a feature in the model). This type of performance evaluation is unique and serves as a proxy  
 153 for confidence in model output, which should prioritize MAPs that were established as functional  
 154 *a priori*. The model functioned as intended, showing increasing enrichment of known functional  
 155 MAPs with increasing model score (**Figure 2C**). Moreover, we observed a decrease in the  
 156 variance of the prediction with increasing KFSC. These same trends were also evident for the

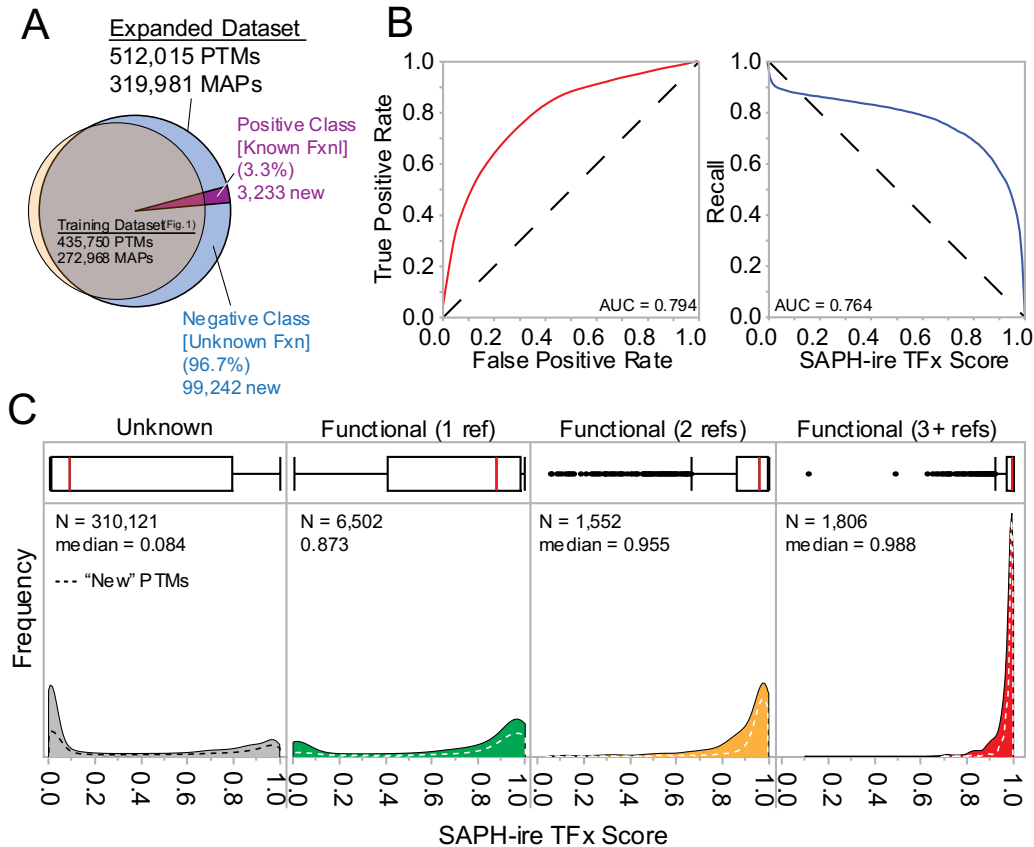

157  
158 **Figure 2. SAPH-re TFX performance on an unexposed dataset.** (A) Venn diagram showing the  
159 relationship between the training and expanded datasets. The expanded dataset contained 102,475 newly  
160 curated PTMs. (B) ROC and recall curves for SAPH-ire TFX results from the expanded dataset. (C)  
161 Frequency distribution of SAPH-ire TFX scores relative to true positive status in terms of known function  
162 source count (KFSC = 0, 1, 2, or 3+ references). Area contained by solid lines corresponds to the total  
163 expanded PTM dataset. Area contained by dashed lines corresponds to model output for unexposed PTMs  
164 not contained in the original training dataset. All statistical data shown is aggregated at the MAP level.  
165

166 3,233 unexposed known functional PTMs in the expanded dataset to which the model was  
167 unexposed during development, demonstrating the robustness of the model (**Figure 2C**, dashed  
168 lines). Taken together, the data show that SAPH-ire TFX is a robust and effective model capable  
169 of distinguishing functional PTMs across independent datasets.

170

171 **Analysis of feature contributions in the SAPH-ire TFX model: No single feature can**  
172 **capture all known function PTMs**

173 SAPH-ire TFX incorporates 11 features derived from both empirically and biologically

174 relevant features. To understand how the model balances these features to reach its

175 conclusions and to determine if it is overly reliant on any single feature, we sampled 29,859 MAPs  
176 and conducted a Linear Interpretability Model Explanation (LIME) analysis to calculate feature  
177 contributions for each MAP. We then clustered the samples in this feature space using normal  
178 mixtures. Clusters 1 and 3 have an overrepresentation of known functional MAPs within them  
179 (70%+) whilst making up less than 9% of the sampled MAPs. In contrast, cluster 2 represents  
180 92% of sampled MAPs but also has a minority population of known functional MAPs (**Figure 3A**).  
181 We used principle components analysis (PCA) to understand the differences in feature  
182 contributions between each cluster, which can give insight into the how SAPHire-TFx decides its  
183 recommendations (**Figure 3B**). We found that 55% of the variance within the sampled MAPs can  
184 be explained by PC1 and PC2, with the other 9 principal components contributing marginally to  
185 the remaining 45%. Furthermore, we found that cluster 1 has a high variance in terms of both  
186 PC1 and PC2, cluster 2 has a low variance in terms of both PC1 and PC2, while cluster 3 is driven  
187 mostly by PC1. In depth analysis of the eigenvector values in PC1, reveal the largest contributor  
188 is OBSrc, which corresponds to raw observation frequency of PTMs within a MAP, although the

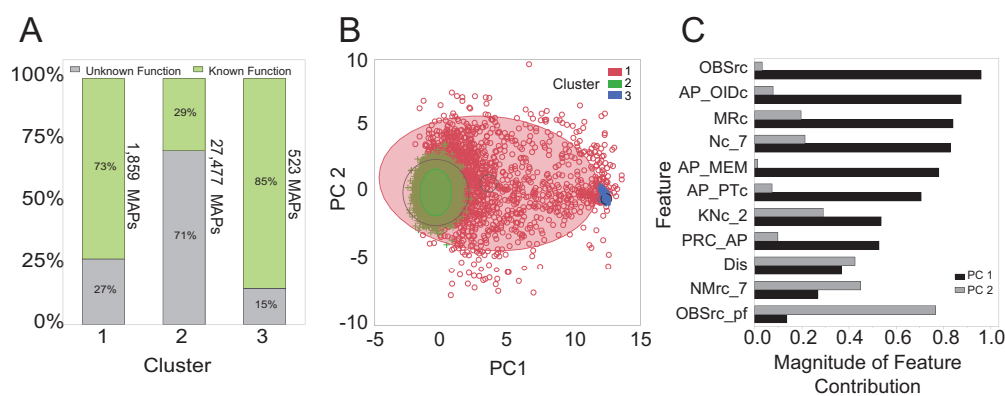

189

190 **Figure 3. Exploring SAPHire TFX's interpretation of feature space.** Normal mixtures clustering of LIME  
191 analysis data from 29,859 representative MAPs. (A) Percentage of MAPs within normal mixture clusters  
192 that are known to contain a functional PTM. (B) Clusters projected onto two of their principal components.  
193 (C) Magnitude of each feature within the principal components shown in B. OBSrc, observation source  
194 count; AP\_OIDc, alignment position organism ID count; MRC, modified residue count; Nc\_7, Neighbor count  
195 within +/- 7 alignment positions; AP\_MEM, alignment position membership count; AP\_PTC, alignment  
196 position PTM type count; KNc\_2, known functional neighbor count within +/- 2 alignment positions;  
197 PRC\_AP, PTM residue conservation for the alignment position; Dis, disorder prediction value; NMrc\_7,  
198 Neighboring modified residue count +/- 7 positions out; OBSrc\_pf, observation source count relative to the  
199 protein family membership. (please see detailed feature descriptions in Table S4)



200 count of organisms contributing a residue to the alignment position (AP\_OIDc), the count of  
201 modified residues in the alignment position (MRc), and the sum of MAPs observed within +/- 7  
202 alignment positions (NC\_7) contribute nearly as much (**Figure 3C**). For PC2, the largest  
203 contributor is observation source count normalized to the number of members in the family  
204 (OBSrc\_pf), but is closely followed by modified residue count in neighboring alignment positions  
205 (NMRc\_7) and disorder tendency (Dis).

206 Extrapolating these characteristics of each principle component reveal that cluster 3,  
207 which is highly reliant on PC1, is largely composed of PTMs that are observed frequently globally  
208 (OBSrc) and have some weak evidence of functionality from a combination of: one, their proximity  
209 to PTMs in neighboring alignment positions; two, the diversity of proteins contributing modified  
210 residues to the alignment position; and three, the conservation of the modification across species,  
211 for example. Restated, members of this cluster correspond with PTMs that are readily detectable  
212 by their detection frequency. Cluster 1 contains PTMs that are observed at a range of frequencies  
213 relative to their family and also have strong supporting evidence from other features. Conversely,  
214 cluster 2 has little evidence of functionality from the major features of PC1 and PC2, and therefore  
215 relies on weak contributions from several features. These results support two major conclusions:  
216 one, that single features alone are incapable of capturing the breadth of variation observed for  
217 functional PTMs; and two, that SAPH-ire TFX can recognize functional modifications despite this  
218 variation.

219

220 **PTM-agnostic recommendation thresholding suggests that most PTM sites are not like**  
221 **those we have found are functional thus far**

222 Without further treatment, the SAPH-ire TFX model would be interpreted as a rank-based  
223 model and, as described earlier, interpretation of such models is difficult. Implementing  
224 recommendation thresholds can be useful to improve interpretation of a model, but

225 simultaneously create boundaries that, if inappropriately placed, can lead to inaccurate  
 226 predictions. To address these problems, we modeled the tradeoff between true and false positive  
 227 rates using ROC curves. Our goal was to set a minimum threshold score over which MAPs could  
 228 be considered having a high chance of functionality. Due to our desire for SAPH-ire scores to be  
 229 agnostic across different PTM types, we first considered that the selected thresholds must not  
 230 create a bias in distribution of PTMs occurring above that threshold. To evaluate this, we plotted  
 231 the percent representation of each of the most common PTMs in the dataset relative to SAPH-ire  
 232 TFx score (**Figure 4A**). The relative representation of each PTM type deflected significantly above  
 233 a score of 0.9897 but was stable below this point and above 0.945, the range between which we  
 234 defined as ideal for thresholding.

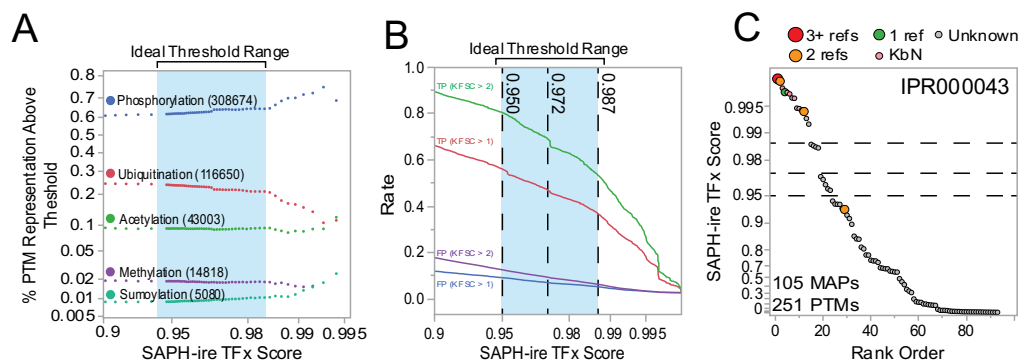

235  
 236 **Figure 4. Derivation of SAPH-ire TFx recommendation thresholds.** (A) Plot of the percent  
 237 representation for different PTM types relative to SAPH-ire TFx score, revealing an ideal threshold range  
 238 inside which no one PTM becomes over or underrepresented. (B) Unfurled ROC curves showing true  
 239 positive (TP) and false positive (FP) rates above given SAPH-ire score. Rates shown are KFSC > 1 (lower  
 240 confidence) or KFSC > 2 (higher confidence). Dashed vertical lines represent chosen thresholds where TP  
 241 and FP rates are as follows (KFSC > 2): 0.95 – TP=0.82, FP=0.11; 0.972 – TP=0.7, FP=0.07; 0.987 –  
 242 TP=0.53, FP=0.04. (C) Representative rank-ordered SAPH-ire TFx plot for family IPR000043  
 243 (Adenosylhomocysteinase-like family) with indicated thresholds shown for reference. Shown on an  
 244 exponential scale to emphasize differences across the scale.  
 245

246 Next, we evaluated the ROC curves for the highest confidence true positive MAPs (KFSC  
 247 >1, >2) (**Figure S1**), and unfurled each curve to reveal the independent rates for true and false  
 248 positives with respect to the SAPH-ire TFx score. From these curves, three thresholds were  
 249 chosen within the ideal range (0.95, 0.9719, and 0.987) that strike a balance between true positive

250 hits and false positive recommendations (**Figure 4B**). These recommendation thresholds provide  
251 useful landmarks to interpret SAPH-ire TFX scores for a protein or family of interest, as shown  
252 here for family IPR000043 (**Figure 4C**). These thresholds also allow for the evaluation of SAPH-  
253 ire in context of other models.

254

## 255 **Benchmarking**

256 SAPH-ire TFX is one of a small number of published algorithms aimed at functional  
257 prioritization of PTMs, and the first recommendation-based model for functional PTMs. We  
258 therefore sought to draw comparisons with these models to gauge overall performance  
259 improvements. Two predominant models currently exist in the public domain: SAPH-ire FPx (S-  
260 FPx) (Dewhurst and Torres, 2017) – an 8-feature neural network PTM ranking model; and a  
261 Phosphosite Functional Score (PFS) model (Ochoa et al., 2019) – a 59-feature gradient boosting  
262 machine learning model trained to identify functional phosphosites.

263 To evaluate the three models equivalently, we compared model scores for phosphosites  
264 represented in all three datasets. PFS was built using a dataset containing 116,268 phosphosites  
265 that resulted from selective re-analysis of raw mass spectrometry data files collected from a broad  
266 range of eukaryotic organisms (Ochoa et al., 2019). Comparing our source database to the PFS  
267 dataset revealed 71% overlap (82,279 phosphosites), however, this number dropped in response  
268 to strict protein family membership criteria (*see materials and methods*). Specifically, of PTMs  
269 that fall within InterPro whole sequence families, 236,982 represent unique phosphosites that  
270 were analyzed by SAPH-ire TFX, and 49,935 of these overlap with ~43% of the PFS dataset  
271 (**Figure 5A**). Inclusion of S-FPx data, which was based on PTMs curated in early 2017, resulted  
272 in a final comparable dataset of 24,695 phosphosites.

273 In general, S-FPx and PFS perform similarly in most respects – in part because they were  
274 both rank based models built to maximize ROC AUC but not recall. Both models result in broad  
275 and overlapping score distributions that are significantly different but modestly distinct between

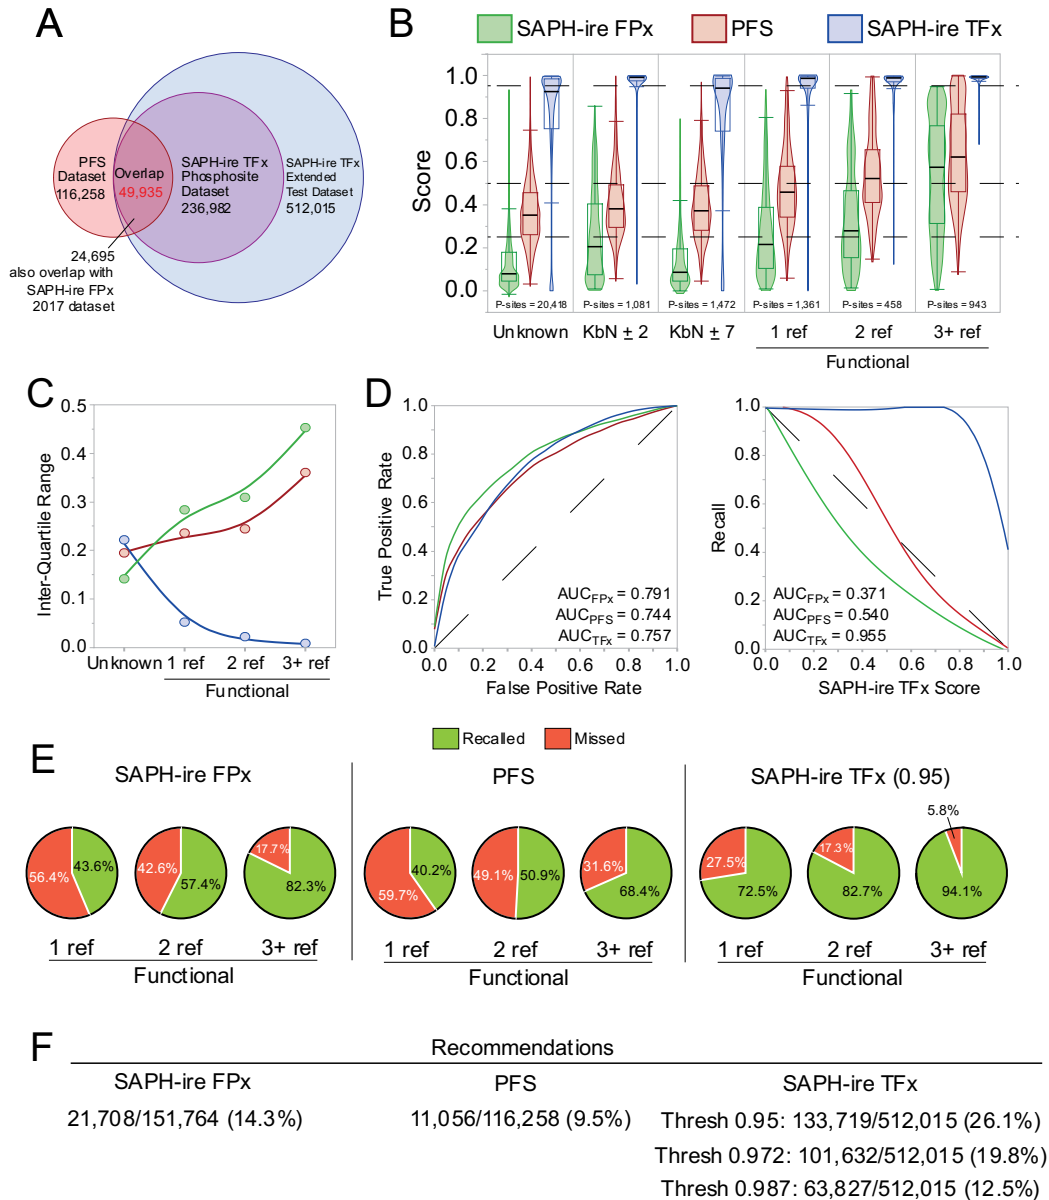

276

277 **Figure 5. Benchmarking SAPH-ire TFX against existing PTM functional prioritization models.** SAPH-  
 278 ire TFX was compared head-to-head with the two prior machine learning models for functional prioritization:  
 279 SAPH-ire FPx (Dewhurst and Torres, 2017) and Phosphosite Functional Score (PFS) (Ochoa et al., 2019).  
 280 (A) Venn diagram describing the overlap between the expanded dataset (reported here) and phosphosite  
 281 datasets for the other two models. Three-way model comparisons were conducted with 24,695  
 282 phosphosites. Pairwise model comparisons (PFS vs. SAPH-ire TFX) were also conducted with 49,935  
 283 overlapping phosphosites (Figure S2). (B) Comparison of the score distributions for PTMs binned by  
 284 category of unknown function, known function (1, 2, or 3+ sources), or known by neighbor (KbN) determined  
 285 by SAPH-ire TFX protein family alignments. Dashed lines indicate the thresholds quantitatively determined  
 286 for SAPH-ire TFX or loosely recommended by other models. (C) Inter-quartile range relative to known  
 287 functional status, based on the distributions shown in B. (D) Comparison of ROC and recall curves for each  
 288 model. (E) Pie chart representation of the percentage of recalled versus mis-called (Missed) PTMs based  
 289 on thresholds shown in B [0.95 threshold used for SAPH-ire TFX] (top). Number of recommendations  
 290 deduced from these percentages applied to the whole dataset for each model (bottom). Recommendations  
 291 are also shown for each of the thresholds established for SAPH-ire TFX in figure 3.

292 sites of known and unknown function (**Figure 5B**). This results from broad score distributions that  
293 change marginally across bins of increasing KFSC. S-FPx tends to have lower average scores  
294 that are compressed for the unknown function category and do not increase dramatically until  
295 reaching KFSC >2 true positive status. PFS exhibits higher overall scores compared to S-FPx but  
296 shows comparable responsiveness to increasing KFSC. The score distribution of the two models  
297 as shown by their inter-quartile ranges also increases by almost 2-fold with increasing KFSC,  
298 which is counter to the expectation for increased confidence in classification (**Figure 5C**).  
299 Consequently, the recommendation thresholds used for S-PFx and PFS must be low to enable  
300 either model to capture even a small percentage of true positive phosphosites. A separate  
301 analysis comparing only PFS and SAPH-ire TFx, which includes a larger phosphosite overlap  
302 (49,935 phosphosites), showed similar results (**Figure S2**).

303 In contrast to S-FPx and PFS, the score distributions for SAPH-ire TFx become less, rather  
304 than more broad with increasing KFSC, concomitant with the expectation for greater confidence  
305 with increasing score (**Figure 5B,C**). ROC and recall curves for all three models show that this  
306 difference is largely due to improved recall performance of SAPH-ire TFx, while ROCAUC is  
307 otherwise similar between the three different models (**Figure 5D**). The practical consequences of  
308 the differences between SAPH-ire TFx and other models is perhaps most evident in terms of the  
309 number of missed calls based on recommended thresholds, where as many as 32% of highly  
310 confident true positive functional phosphosites ( $KFSC_{MAP} > 2$ ) are mis-called by previous models  
311 – a quantity that is lowered to less than 6% in SAPH-ire TFx (**Figure 5E**). This trend was not  
312 specific to whether the phosphosite was a serine, threonine, or tyrosine, further suggesting that  
313 SAPH-ire TFx performs equally well regardless of this distinction (**Figures S3**). This also results  
314 in an increase in the number of PTMs recommended as functional at all thresholds (**Figure 5F**).  
315 Both PFS and SAPH-ire TFx performed equally well for phosphosites whose functionality could  
316 have been easily predicted through association with validated functional SLiMs defined by the  
317 ELM resource database (**Figure S4**).

318 We next compared all three models to a recently published fourth model that is not based  
319 on machine learning, but rather on a derivative of sequence homology modeling (Strumillo et al.,  
320 2018) (**Figure S5**). In brief, this method defines phosphorylation hotspots based on sequence  
321 conservation of protein regions in domain families that are densely populated with observed  
322 phosphorylation sites. In general, high scores were enriched for conserved phosphosite hotspots  
323 regardless of model, with SAPH-ire TFX exhibiting the best overall performance in terms of recall  
324 and score distribution across KFSC.

325 In summary, benchmarking tests of SAPH-ire TFX support the conclusion that the model  
326 is robust and effective for the classification of PTM functional status and surpasses the recall  
327 performance of previous models.

328

### 329 **Evaluating the model using newly reported experimental evidence and disease linkage**

330 A fortuitous time gap between model development and the writing of this report allowed  
331 us to test the accuracy of SAPH-ire TFX predictions using newly reported experimental evidence  
332 that arrived after scoring was complete. Between June and December 2019, an update to the  
333 functional site database curated by PhosphoSitePlus resulted in an increase of 1066 new  
334 functional PTM sites. Consequently, we could use the new data to simulate a situation in which  
335 an experimentalist has chosen to investigate the functional impact of a PTM upon  
336 recommendations provided by SAPH-ire TFX. In this case, MAPs originally classified as 'unknown'  
337 in the model output could be re-classified as known functional and then this information used to  
338 evaluate model effectiveness. To do this, we cross-referenced the new functional data with  
339 existing data from the SAPH-ire TFX expanded dataset, revealing 723 MAP associations (**Figure**  
340 **6A**). Of these, we further discriminated between two classes: PTMs previously associated with  
341 MAPs that were already known to be functional due to association with functionality in other PTMs  
342 (Class I; 228) and PTMs associated with MAPs previously unassociated with any functional

343 evidence (Class II; 495). In each class, the curated functional mechanisms regulated by these  
344 PTMs were diverse – spanning from regulatory control over molecular association to protein  
345 localization, enzyme activity, receptor internalization, and protein degradation/stability (**Figure**  
346 **6A**).

347 The median SAPH-ire TFX score for functional PTMs in class I was above the  
348 recommendation threshold for MAPs of known function previously supported by evidence from 1  
349 to 3+ references (**Figure 6B, left**). Moreover, new functional PTMs with more than one reference  
350 (from the December 2019 update) were further enriched above the threshold in most cases (red  
351 circles). Some of the associated references for the new functional data were from as recent as

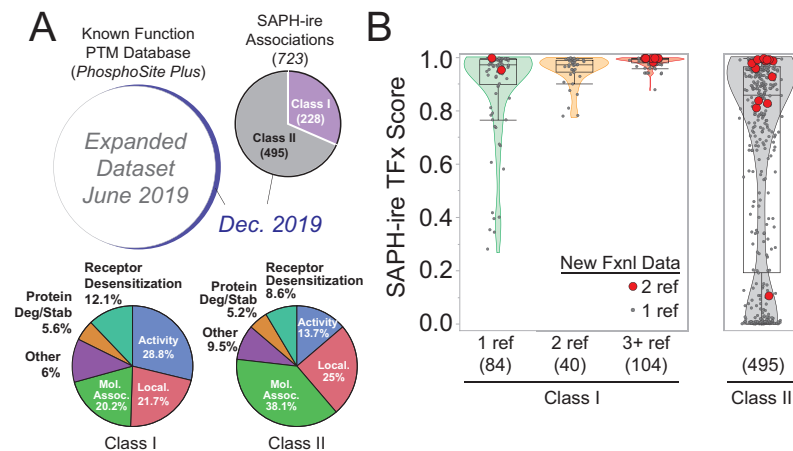

352

353 **Figure 6. SAPH-ire TFX performance with new functional and disease-linked PTM data.** (A, top) Venn  
354 diagrams depicting new functional PTM data in comparison to the expanded dataset from figure 2. Class I  
355 PTMs are new functional PTM data already associated with known functional MAPs in SAPH-ire TFX. Class  
356 II PTMs are new functional PTM data associated with MAPs previously classified as unknown functional  
357 (represent completely new experimental data). (A, bottom) pie chart indicating molecular function  
358 categories curated for the new functional PTMs. (B) Score distributions for new functional PTM data in  
359 Class I and Class II. Red circles correspond to PTMs with 2 references supporting functional impact of the  
360 PTM (from the December 2019 update). Original MAP classification (1, 2, 3+ refs) is based on the original  
361 classification from figure 2.

362

363 2018, which suggest that experimental redundancy within a MAP is common and also probably  
364 not always well known to the experimentalist – hence the advantage of tracking function via  
365 alignment position in a family. In class II, which represent new functional PTMs that align with  
366 MAPs previously classified as unknown function, we found a similar trend (**Figure 6B, right**).



367 Although the median score was slightly below our lowest threshold of 0.95, the bulk density of the  
368 new data scored near or above this threshold. Similarly, most new functional PTM data with more  
369 than one reference (red circles) were enriched above the recommendation thresholds for SAPH-  
370 ire TFX. Finally, we also noted that several new functional PTMs also scored poorly by SAPH-ire  
371 TFX in class II. However, benchmark comparisons against S-PFX and PFS again showed  
372 significant improvement in recall of the newly reported functional PTMs by SAPH-ire TFX,  
373 suggesting that the model outperforms existing methods (**Figure S6**). Time will be necessary to  
374 establish if new reports of PTM function are corroborated by more than one investigation before  
375 any further conclusions can be drawn. In summary, new functional PTM data serve as proxies for  
376 experimental validation of the SAPH-ire TFX model and provide strong evidence that the model  
377 is effective for recommending functional modifications that span a broad range of molecular  
378 control mechanisms.

379

### 380 **SAPH-ire TFX in practice: Recommending PTMs of unknown function at the intersection** 381 **of empirical and computational evidence**

382 Once validated, we decided to use SAPH-ire TFX predictions to filter PTMs that are  
383 proximal to functional residues and/or localized within functional short linear motifs (SLiMs). We  
384 reasoned that such an effort would highlight PTMs of potentially high biological impact. Therefore,  
385 we investigated SAPH-ire TFX-recommended PTMs that are within 3 residues of a pathogenic  
386 amino acid substitution mutation (curated by ClinVar) and within a predicted functional SLiM motif  
387 (curated by the ELM resource). 517 PTMs within the SAPHire-TFX set met these conditions  
388 (**Figure 7A**). Among these, 84 PTMs were already known to be functional and among the  
389 remaining 433 unknown function PTMs, 160 (36.9%) were recommended by SAPH-ire TFX  
390 (**Figure 7B; Table S5**). To assess the biological landscape of the recommended PTMs, we  
391 performed a gene ontology (GO) enrichment analysis (<http://geneontology.org>) of proteins in the  
392 recommended list normalized to the GO enrichment of all human PTMs in the extended dataset



393 (Consortium, 2018). Several GO terms from Biological Process, Molecular Function, and Cellular  
394 Component GO categories were significantly enriched beyond expectation (up to ~83-fold after  
395 normalization) (**Table S6**). Several major clusters are immediately evident – most notably:  
396 muscle, cardiac, heart; morphogenesis & development; as well as transmembrane, receptor, and  
397 signaling, among others (**Figure 7C**). This is consistent with our previous observation that several  
398 unknown function PTMs are enriched in cardiomyopathies (Torres et al., 2016), and reiterate that  
399 this area of biology may be understudied in terms of PTM regulation.

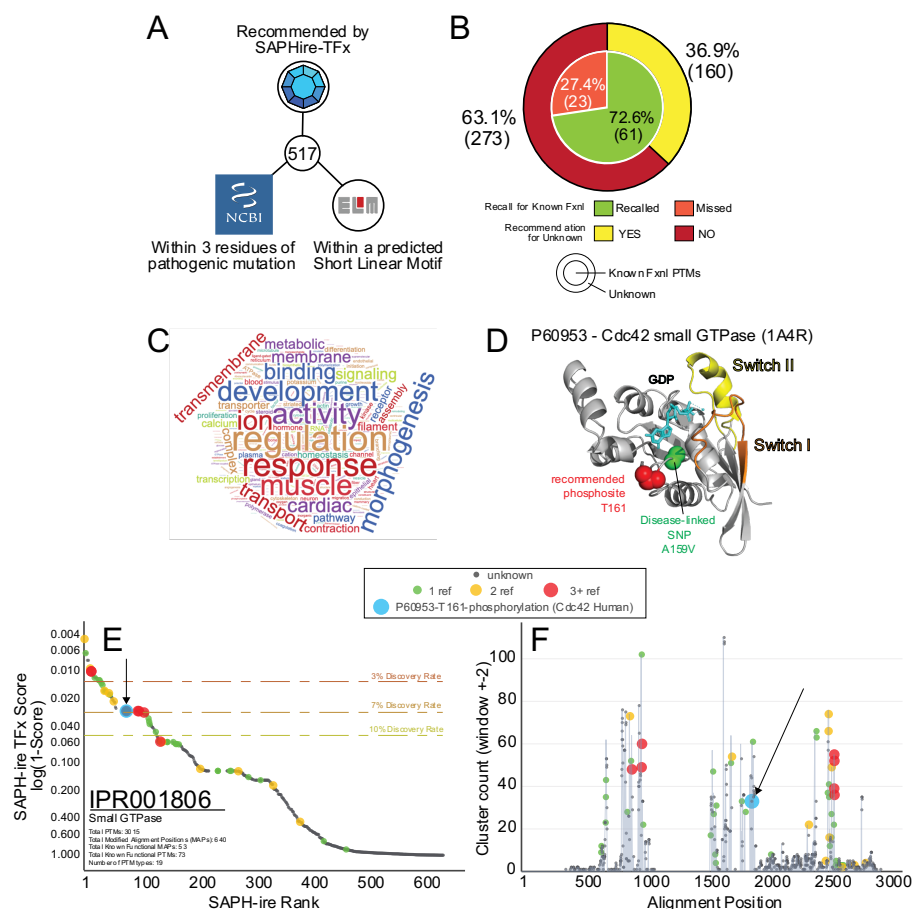

400

401 **Figure 7. Exploring PTMs at the intersection of multiple independent sources of functional evidence.**

402 (A) Schematic diagram depicting the tri-partite filter used for identifying critically important PTMs here. (B)  
403 Analysis of recall and recommendation rates for the resulting 517 filtered PTMs derived in A. (C) Word cloud  
404 diagram showing term frequency within the GO terms enriched between 5x-85x over expectation (greater  
405 frequency = larger size). (D) X-ray crystal structure (PDB:1A4R) of human Cdc42 with important regulatory  
406 (yellow/orange), PTM (red), and disease-linked mutation sites indicated (green). (E,F) SAPH-ire TFx MAP  
407 rank plot and PTM cluster count plot with known and unknown function MAPs indicated by color and circle  
408 size (downloaded from <https://saphire.biosci.gatech.edu>).

409

410           Surveying the 160 recommended PTMs of unknown function revealed several hotspots  
411 across a wide variety of very important proteins. After filtering further by whether the PTM is in  
412 the vicinity of a known functional modification (Known by Neighbor), resulted in 49 distinct PTMs  
413 for which we found no evidence of function reported (**Table S5**). Several PTMs in actin and other  
414 muscle/heart-related proteins dominated the list. We were particularly surprised to find a  
415 phosphosite (T161) in Cdc42, a small GTPase critical for actin dynamics and cell polarity  
416 regulation, and an important cancer target (Maldonado and Dharmawardhane, 2018). The  
417 recommended site falls very close to the catalytic pocket of the enzyme much like the switch I/II  
418 regions that are essential for GTPase activity regulation (**Figure 7D**). We used the SAPH-ire  
419 website (<https://saphire.biosci.gatech.edu>) to view T161 in context of the small GTPase family  
420 (IPR001806), finding that the site is one of over 3000 distinct family PTMs and falls within a MAP  
421 that ranks in the top 100 (**Figure 7E**). While this site does fall within a small cluster of PTMs in  
422 the family, it is one that is understudied compared to other regions of the protein, made obvious  
423 by the KFSC markers for known function sources (green, yellow, red circles) (**Figure 7F**). Taken  
424 together, these data demonstrate the utility of SAPH-ire TFX as a model and a resource for the  
425 study of PTMs in eukaryotes.

426

## 427 **DISCUSSION**

428           We have created a new machine learning model – SAPH-ire TFX – that is capable of  
429 confidently recommending PTMs of likely functional significance. The model is shown to be highly  
430 predictive for recall of PTMs of known function, and this property is enhanced at increasing  
431 recommendation thresholds provided by the model. After its development, we tested the model  
432 with an expanded dataset to which it had never been previously exposed, showing that its  
433 performance characteristics are robust. To estimate its performance with physiologically relevant  
434 predictions, we demonstrated that the model functions adequately to predict the functionality of  
435 PTMs curated 6 months after the model was developed and tested – providing a type of meta-

436 experimental validation that goes beyond previously reported models. In a series of benchmarking  
437 tests, we further showed that SAPH-ire TFx outperforms existing machine learning or  
438 conservation-based hotspot models (including one of our previous models) in all respects,  
439 including ROC, recall, and prediction confidence (**Figure 5**). Finally, we provide quantitatively  
440 validated thresholds that maximize confidence, recall, and recommendations of unknown function  
441 PTMs (the goal of the model).

442 Through development and validation of SAPH-ire TFx, we have shown that single features  
443 often held as the standard for predicting whether or not a PTM is likely to be functional – such as  
444 evolutionary conservation or proximity to catalytic residues – are not capable by themselves of  
445 capturing the breadth of functional PTM observed over the last several decades. Thus, we  
446 suspect that models failing to validate the capture of these true positive data can suffer in their  
447 ability to make confident recommendations. By all benchmarking tests conducted, the SAPH-ire  
448 TFx model captures the largest swath of known functional PTMs. Evidence from LIME analysis  
449 of model feature contributions shows that this is in part due to its ability to capture functional PTMs  
450 based on more than one combination of features. Indeed, the model recalls known functional  
451 PTMs using either strong evidence from a single feature or weaker evidence across several  
452 features (**Figure 3**). Consequently, SAPH-ire TFx exhibits equivalence to other models in the  
453 recall of *low hanging fruit*, represented by PTMs whose role in protein function could be easily  
454 guessed by conservation, proximity to functional residues or observation frequency (**Figure S3**);  
455 however, it significantly outperforms these models in the recall of *high hanging fruit*, represented  
456 by PTMs that are not easily recognized as functional by any one single feature alone (**Figure 5**,  
457 **S5**).

458 Considering its ability to capture a broad range of functional PTM, SAPH-ire TFx shows a  
459 considerable increase in the number of PTM sites recommended as likely functional (Figure 4F).  
460 Importantly, these recommendations are based on very strict thresholds (score  $\geq 0.95$ , 0.975,  
461 0.985) that capture the top 67% (at most) of all known functional modifications (at score  $\geq 0.95$ )

462 included in the study. If we loosen this threshold to score = 0.75, nearly 90% of currently known  
463 functional PTMs are captured. However, even at this loose threshold nearly half (~47%) of PTMs  
464 with unknown function would not be recommended. While we would not conclude that everything  
465 below a score of 0.75 is non-functional, we can conclude that PTMs below this loose threshold  
466 do not share feature combinations observed for 90% of the functional PTM sites reported thus  
467 far. This is striking and suggests multiple possibilities: that a vast majority of studies on the  
468 functionality of a PTM have been historically restricted to those falling within a narrow range of  
469 specific features (e.g. observation frequency) or that nearly half of all observed PTMs are non-  
470 functional *noise* in our biological systems of interest. It's also possible that SAPH-ire TFx does  
471 not efficiently detect PTMs whose function is mediated through interaction with other  
472 modifications. We have begun to evaluate the first two hypotheses through experimental  
473 validation of SAPH-ire output wherein we empirically test the functionality of PTM sites across the  
474 range of SAPH-ire scores regardless of recommendation thresholds (Mukherjee et al., 2019).  
475 While our findings have been consistent with the noise hypothesis, more evidence will be  
476 necessary to understand this question carefully. Indeed, evidence necessary to train machine  
477 learning models to detect combinatorial regulatory modifications is severely limiting. In any case,  
478 the SAPH-ire TFx model provides the most comprehensive view of functionality to date.

479 All of the data described in this report is publicly accessible at  
480 <https://saphire.biosci.gatech.edu>. The site allows investigators to explore several aspects of the  
481 SAPH-ire TFx model through customizable graphical or tabular output. This resource includes not  
482 only scoring data, but also several other features that are borne from multiple sequence alignment  
483 of PTMs (i.e. MAPs) including: the relation to known functional PTM data (neighboring or aligned),  
484 protein and family-specific information, PTM type information, density or PTM clustering  
485 information, among other outputs that enable one to quickly survey any given protein or protein  
486 family for direct and aligned PTM evidence. We have shown an example of the graphical output  
487 here (**Figure 7E,F**), and have ensured that capturing these graphics for use by the end user is

488 simple. As a result of these efforts we hope to propel forward the study and understanding of PTM  
489 function not only through an improved quantitative model but also through improved  
490 accessibility/visualization – both of which are equally important to ensure future progress in the  
491 field.

492

## 493 **MATERIALS AND METHODS**

### 494 **PTMs and multiple sequence alignment**

495 SAPH-ire TFX is PTM agnostic and includes 56 different PTM types (PTMtype), the bulk  
496 of which correspond to phosphorylation, ubiquitination, acetylation, methylation, N-linked  
497 glycosylation, and sumoylation (**Table S1**). PTMs were collected from multiple sources including  
498 PhosphositePlus (Hornbeck et al., 2015), SysPTM (Li et al., 2014), and dbPTM (Huang et al.,  
499 2016). Each PTM was mapped to UniProt identifiers (UID) and validated by matching the native  
500 position (NP) and residue (res) of the curated PTM to UniProt sequences verified for 100%  
501 sequence identity using BLAST (Altschul et al., 1990). Isoforms, although rare in the PTM dataset,  
502 were also included. The final PTM dataset for training contained 435,750 unique PTMs (identified  
503 by UID-NP-res-PTMtype).

504 Later this process was repeated with an expanded PTM dataset for the purpose of model  
505 validation. UID entries were mapped to whole sequence protein families using InterPro (Mitchell  
506 et al., 2015) followed by multiple sequence alignment of family-linked UniProt sequences using  
507 MUSCLE with default parameters (Edgar, 2004). Families with fewer than 2 members containing  
508 at least 1 PTM per member were excluded. This process resulted in a final 512,015 PTMs mapped  
509 to 8,039 families (**Table S2**) containing 38,231 UIDs representing 763 eukaryotic organisms  
510 (**Table S3**).

## 511 **Feature selection**

512           SAPH-ire features were derived from Modified Alignment Positions (MAPs) corresponding  
513 to family alignment positions that harbor at least one PTM, as described previously in detail  
514 (Dewhurst and Torres, 2017; Torres, 2016). A total of eleven features were extracted from  
515 319,981 MAPs (containing the 512,015 PTMs) for inclusion in neural network models described  
516 below (**Table S4**). The number of unique PTM types observed in the alignment position (AP\_PTc),  
517 the PTM residue conservation within the alignment position (PRC), the predicted disorder of the  
518 modified residue (Dis), and the number of unique modified residues within the alignment position  
519 (Modified residue count; MRc) all provide the model with an evolutionary conservation-based  
520 perspective on the MAP – a feature that has been shown to be effective in the past (Landry et al.,  
521 2009). The next group of features provide information on the local environment of the MAP (not  
522 including the MAP in question) by providing the modified residue count of neighboring MAPs  
523 (NMrc), the count of neighboring MAPs with modification (Neighbor count, Nc), and neighboring  
524 MAPs that harbor known functional PTM (Known neighbor count, KNc). Neighboring residue  
525 context has been shown to be an effective predictive feature in the past by us and others (Beltrao  
526 et al., 2012; Minguéz et al., 2015). Lastly, the number of sources that have reported observation  
527 of the PTM (observation source count; OBSrc), a normalized version of this feature that takes  
528 family membership into account (OBSrc\_pf), and the number of UniProt entries associated with  
529 the MAP excluding gaps (Alignment position member count, AP-MEM) are utilized in this model  
530 for the first time here.

531

## 532 **Model implementation, cost function optimization, training, and model selection**

533           The SAPH-ire TFX neural network model and modified cost function (defined below) were  
534 implemented in Tensorflow using the estimator API (Abadi et al., 2016). PTMs and MAPs were  
535 processed into features using Python 3.7.3 and Pandas 0.24.0 (McKinney, 2010). MAPs with at  
536 least two references (PMIDs) of corroborating evidence of biological function, defined by

537 PhosphositePlus (Hornbeck et al., 2015), were treated as the positive class with all others being  
538 treated as negative. MAPs with a single source were treated as negative because they lacked  
539 independent confirmation of functional significance and because their inclusion weakened model  
540 performance. The cost for false negatives (misclassified known functional PTMs) was weighted  
541 at a 4 to 1 ratio to false positives (PTMs with unknown function classified as functional) to reflect  
542 the goal of recommending unstudied PTMs for research. Below this 4:1 ratio the performance  
543 suffered, and above it there was no significant improvement while the model began to exhibit  
544 signs of overfitting.

545 Neural network models of various structure (in terms of connectivity, activation function,  
546 cost function weighting, etc.) were generated in batches of 100 or 200 depending on architecture  
547 complexity. The training set for these models were bootstrapped in order to over-represent the  
548 positive class to avoid sample distribution biasing (Dupret and Koda, 2001). Models were trained  
549 using a 33% holdback rate, with this holdback being used to evaluate batches of models against  
550 the same evaluation set. Model selection relied on Receiver Operating Characteristic (ROC) and  
551 Recall summarization metrics integrated by an Fzero score defined as:

552

553

$$Fzero = 2 * \frac{auroc * recall}{auroc + recall}$$

554

555 Optimal models were defined as those with the greatest Fzero score.

556

### 557 **SAPH-ire TFX model architecture and optimizing performance through recall**

558 For model training, we used a SAPH-ire training dataset generated in 2018, consisting of  
559 435,750 PTMs coalesced by multiple sequence alignment into 272,968 MAPs (**Figure 8A**). From  
560 each of more than a dozen architecture and training permutations, 200 models were stochastically  
561 trained and evaluated by Fzero and Recall and then filtered to identify the most consistently high



562 performing architectures (Batch 1). Due to the intended goal of SAPH-ire to identify “potential  
 563 positives”, a high precision (true positives captured / total positives) was not only unwanted but  
 564 indicative of a poor model and therefore not included as a summary metric. The agreement  
 565 between most of the models made collective intelligence approaches redundant. Therefore, an  
 566 additional series of models trained with an added feature (family-weighted observation source  
 567

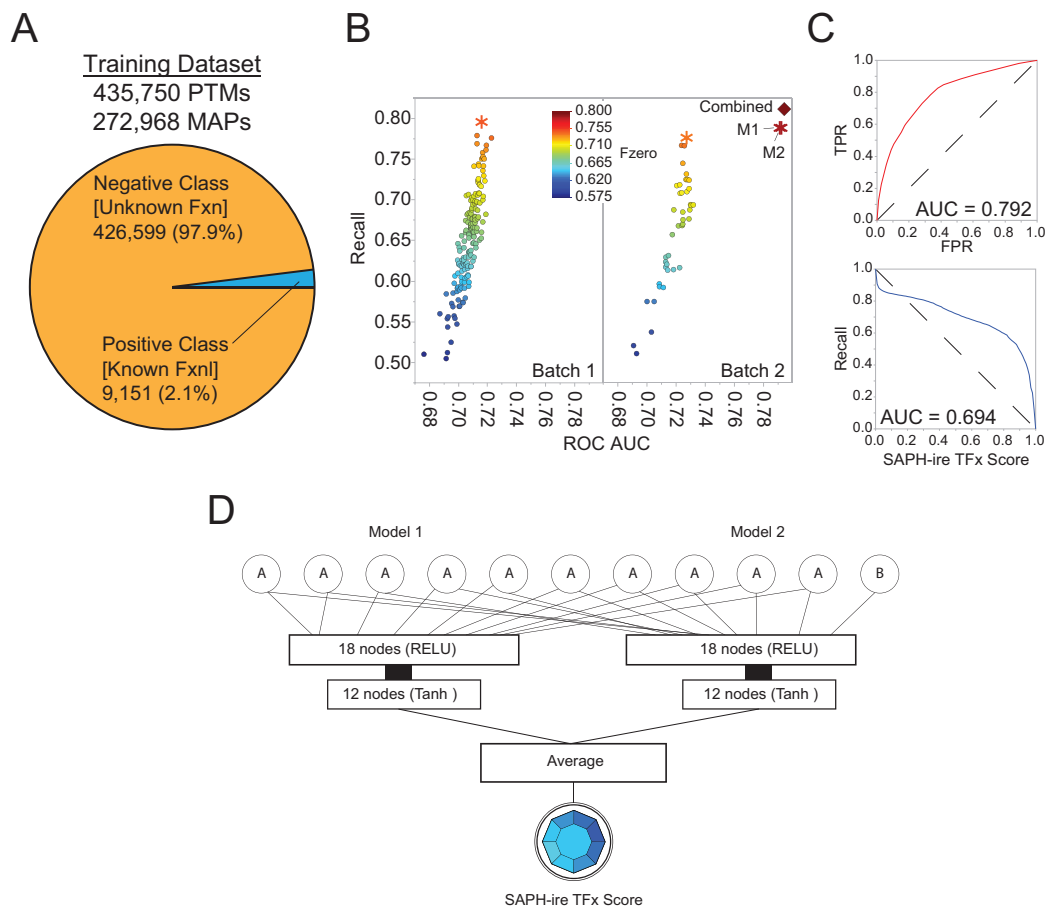

568  
 569  
 570 **Figure 8. Numerical summary of SAPH-ire TFX development, training, and performance.** (A) Diagram  
 571 of the training dataset with positive and negative classes indicated. Note that Modified Alignment Positions  
 572 (MAPs) with less than 2 literature sources of support were included in the negative class as they were not  
 573 used at any point for training the model (see methods). (B) Plot of true positive recall versus ROC AUC  
 574 versus Fzero (color) for the top two of 200 models generated using ten (Batch 1) or eleven (Batch 2)  
 575 features (MAP-level analysis). Dashed box (on same scale) indicates performance of individual top models  
 576 from Batch 1 and 2 (M1, M2) and a combined model (SAPH-ire TFX) that is generated by taking the average  
 577 score of M1 and M2 on the expanded dataset (shown further below). (C) ROC and recall threshold curves  
 578 for the combined model (based on MAP-level analysis). (D) Final model architecture, in which the 10 shared  
 579 input features [A] and 1 unique input feature [B] of M1 and M2 are indicated.  
 580



581 count) were generated (Batch 2). In general, the top model from each batch varied only slightly in  
582 terms of ROC AUC (0.68 – 0.73), but varied dramatically in recall (0.5 – 0.8), suggesting that  
583 significant gains in model performance were achieved by considering recall in addition to ROC  
584 AUC (**Figure 8B**). The top performing models from these two independent evaluations were  
585 averaged together to represent the final SAPH-ire score, which outperformed either top model  
586 alone (**Figure 8B** (inset)). This final score resulted in excellent predictive (AUC = 0.792) and recall  
587 (AUC = 0.694) performance (**Figure 8C**). The top model from Batch 1 (Model 1; representing a  
588 global perspective) and Batch 2 (Model 2; representing a local perspective) rely on the same  
589 architecture in which the input layer flows into two hidden layers consisting of a rectified linear  
590 unit (RELU) followed by a saturating tanh function (**Figure 8D**). The RELU allows for scaling the  
591 inputs and dampening the impact of large differences in the magnitude of the features, while the  
592 tanh layer compresses the output to a fixed probability distribution. Model 1 takes in 10 features  
593 without pre-processing, allowing it to use the network architecture to scale the inputs globally. In  
594 contrast, Model 2 uses 11 features, with observation source count normalized by family for each  
595 MAP serving as the additional feature and the other 10 features normalized globally. The output  
596 of both models are averaged together to give the SAPH-ire TFX score.

597

## 598 **Pathogenic SNP and Motif Enrichment Analysis**

599 Genetic mutations and the curated interpretation of their significance to disease were  
600 collected from Clinvar (Landrum et al., 2018). The proteins affected by genetic mutations were  
601 filtered for single nucleotide polymorphisms (SNPs) that alter PTM sites present within the SAPH-  
602 ire dataset. These sites were then aggregated by SAPH-ire MAP and separated into one of four  
603 Clinvar-designated categories: Benign, Likely Benign, Pathogenic, or Likely Pathogenic. Only  
604 pathogenic categories were used for further analysis.

605 Experimentally validated Short Linear Motifs (SLiMs) were collected from The Eukaryotic  
606 Linear Motif (ELM) resource for functional sites in proteins (Gouw et al., 2018). At the time of this

607 study, ELM contained 289 motif classes clustered into 6 motif categories based on functional  
608 assessment of 3,523 validated instances. Only PTMs that occurred within a validated motif  
609 instance in any category were used for the motif enrichment analysis.

610 In order to identify additional instances of motifs outside of the experimentally validated  
611 set provided by ELM, we scanned the proteins contributing to the SAPH-ire TFX dataset for amino  
612 acid sequences matching the regular expression patterns provided by ELM. As a purely regular  
613 expression based approach would produce numerous false positives, the resulting SLiMs were  
614 filtered based on conservation of the detected motif within a multiple sequence alignment of  
615 the protein family, only keeping those that had more than 40% occurrence at precise  
616 alignment positions within the family – as prescribed by ELM curators previously (Gibson et  
617 al., 2015).

618 To investigate PTMs at the intersection of functional SLiM motifs, pathogenic SNP  
619 mutations and SAPHire-TFX recommendations, PTMs within the expanded dataset were filtered  
620 based on the following criteria: (1) The PTM must be recommended by SAPHire-TFX; (2) The  
621 PTM must be within 3 residues of a pathogenic SNP mutation that changed the amino acid  
622 sequence of the associated protein; and (3) The PTM must reside within a predicted SLiM that  
623 has passed the previously stated regular expression filters.

624

## 625 **Graphical and statistical data analyses**

626 Graphical and statistical data analyses were achieved using a combination of R (R Core  
627 Team, 2013), Python (specifically the pandas library) (McKinney, 2010), and JMP 14.1 (SAS  
628 Institute Inc.).

629

## 630 **SAPH-ire Website**

631 The SAPH-ire website (<https://saphire.biosci.gatech.edu>) is composed of three  
632 microservices managed by Docker (<https://www.docker.com/community/open-source>). The  
633 SAPH-ire dataset including predictions is loaded into a MongoDB microservice  
634 (<https://www.mongodb.com/>), which is then queried dynamically by Unicorn microservice  
635 (<https://github.com/benoitc/unicorn>). The Unicorn microservice serves as the API which is  
636 accessible directly at the api endpoint of the SAPH-ire site with structured queries. The API is  
637 read by a visualization microservice developed using Vue.js (You, n.d.), Plotly (Inc., 2015), and  
638 Vuetify (Leider, 2020). Vue.js was used to create the interactive single page application, Vuetify  
639 provided reactive application components, and Plotly provided dynamic graph element.

640

#### 641 **ACKNOWLEDGEMENTS**

642 We would like to thank Zahra Nassiri Toosi, Wei Li, and other members of the Torres lab  
643 for careful review and beta-testing of the SAPH-ire website. Special thanks also to Jiani Long and  
644 Ragy Haddad for pilot work on the model and website conceptualization. Special thanks to Dr.  
645 Peng Qiu of Georgia Institute of Technology for critical review of the manuscript and contributions  
646 to model design. This work was funded by National Institutes of Health R01 GM117400 and to  
647 M.T.

648

#### 649 **COMPETING INTERESTS**

650 The authors declare they have no competing interests.

651 **REFERENCES**

- 652
- 653 Abadi M, Barham P, Chen J, Chen Z, Davis A, Dean J, Devin M, Ghemawat S, Irving G, Isard  
654 M, Kudlur M, Levenberg J, Monga R, Moore S, Murray DG, Steiner B, Tucker P,  
655 Vasudevan V, Warden P, Wicke M, Yu Y, Zheng X. 2016. TensorFlow: A system for large-  
656 scale machine learning.
- 657 Altschul SFF, Gish W, Miller W, Myers EWW, Lipman DJJ. 1990. Basic local alignment search  
658 tool. *J Mol Biol* **215**:403–10. doi:10.1016/S0022-2836(05)80360-2
- 659 Beltrao P, Albanèse V, Kenner LR, Swaney DL, Burlingame A, Villén J, Lim W a, Fraser JS,  
660 Frydman J, Krogan NJ. 2012. Systematic functional prioritization of protein  
661 posttranslational modifications. *Cell* **150**:413–25. doi:10.1016/j.cell.2012.05.036
- 662 Chen C, Huang H, Wu CH. 2017. Protein Bioinformatics Databases and Resources. *Methods*  
663 *Mol Biol* **1558**:3–39. doi:10.1007/978-1-4939-6783-4\_1
- 664 Consortium TGO. 2018. The Gene Ontology Resource: 20 years and still GOing strong. *Nucleic*  
665 *Acids Res* **47**:D330–D338. doi:10.1093/nar/gky1055
- 666 Csizmok V, Forman-Kay JD. 2018. Complex regulatory mechanisms mediated by the interplay  
667 of multiple post-translational modifications. *Curr Opin Struct Biol* **48**:58–67.  
668 doi:10.1016/j.sbi.2017.10.013
- 669 Dewhurst HM, Choudhury S, Torres MP. 2015. Structural Analysis of PTM Hotspots (SAPH-ire)-  
670 -A Quantitative Informatics Method Enabling the Discovery of Novel Regulatory Elements  
671 in Protein Families. *Mol Cell Proteomics* **14**:2285–97.
- 672 Dewhurst HM, Torres MP. 2017. Systematic analysis of non-structural protein features for the  
673 prediction of PTM function potential by artificial neural networks. *PLoS One* **12**:e0172572.  
674 doi:10.1371/journal.pone.0172572
- 675 Dupret G, Koda M. 2001. Bootstrap re-sampling for unbalanced data in supervised learning. *Eur*  
676 *J Oper Res* **134**:141–156. doi:10.1016/S0377-2217(00)00244-7
- 677 Edgar RC. 2004. MUSCLE: multiple sequence alignment with high accuracy and high  
678 throughput. *Nucleic Acids Res* **32**:1792–1797. doi:10.1093/nar/gkh340
- 679 Gibson DG, Glass JI, Lartigue C, Noskov VN, Chuang R-Y, Algire M a, Benders G a, Montague  
680 MG, Ma L, Moodie MM, Merryman C, Vashee S, Krishnakumar R, Assad-Garcia N,  
681 Andrews-Pfannkoch C, Denisova E a, Young L, Qi Z-Q, Segall-Shapiro TH, Calvey CH,  
682 Parmar PP, Hutchison C a, Smith HO, Venter JC. 2010. Creation of a bacterial cell  
683 controlled by a chemically synthesized genome. *Science* **329**:52–6.  
684 doi:10.1126/science.1190719
- 685 Gibson TJ, Dinkel H, Van Roey K, Diella F. 2015. Experimental detection of short regulatory  
686 motifs in eukaryotic proteins: tips for good practice as well as for bad. *Cell Commun Signal*  
687 **13**:42. doi:10.1186/s12964-015-0121-y
- 688 Gouw M, Michael S, Sámano-Sánchez H, Kumar M, Zeke A, Lang B, Bely B, Chemes LB,  
689 Davey NE, Deng Z, Diella F, Gürth C-M, Huber A-K, Kleinsorg S, Schlegel LS, Palopoli N,  
690 Roey K V, Altenberg B, Reményi A, Dinkel H, Gibson TJ. 2018. The eukaryotic linear motif  
691 resource – 2018 update. *Nucleic Acids Res* **46**:D428–D434. doi:10.1093/nar/gkx1077
- 692 Hornbeck P V, Zhang B, Murray B, Kornhauser JM, Latham V, Skrzypek E. 2015.

- 693 PhosphoSitePlus, 2014: mutations, PTMs and recalibrations. *Nucleic Acids Res* **43**:D512-  
694 20. doi:10.1093/nar/gku1267
- 695 Huang K-Y, Su M-G, Kao H-J, Hsieh Y-C, Jhong J-H, Cheng K-H, Huang H-D, Lee T-Y. 2016.  
696 dbPTM 2016: 10-year anniversary of a resource for post-translational modification of  
697 proteins. *Nucleic Acids Res* **44**:D435--D446. doi:10.1093/nar/gkv1240
- 698 Inc. PT. 2015. Collaborative data science.
- 699 Johnson JR, Santos SD, Johnson T, Pieper U, Strumillo M, Wagih O, Sali A, Krogan NJ, Beltrao  
700 P. 2015. Prediction of Functionally Important Phospho-Regulatory Events in *Xenopus*  
701 *laevis* Oocytes. *PLOS Comput Biol* **11**:e1004362. doi:10.1371/journal.pcbi.1004362
- 702 Landrum MJ, Lee JM, Benson M, Brown GR, Chao C, Chitipiralla S, Gu B, Hart J, Hoffman D,  
703 Jang W, Karapetyan K, Katz K, Liu C, Maddipatla Z, Malheiro A, McDaniel K, Ovetsky M,  
704 Riley G, Zhou G, Holmes JB, Kattman BL, Maglott DR. 2018. ClinVar: improving access to  
705 variant interpretations and supporting evidence. *Nucleic Acids Res* **46**:D1062--D1067.  
706 doi:10.1093/nar/gkx1153
- 707 Landry CR, Levy ED, Michnick SW. 2009. Weak functional constraints on phosphoproteomes.  
708 *Trends Genet* **25**:193--7. doi:10.1016/j.tig.2009.03.003
- 709 Leider J. 2020. Vuetify.
- 710 Li J, Jia J, Li H, Yu J, Sun H, He Y, Lv D, Yang X, Glocker MO, Ma L, Yang J, Li L, Li W, Zhang  
711 G, Liu Q, Li Y, Xie L. 2014. SysPTM 2.0: an updated systematic resource for post-  
712 translational modification. *Database (Oxford)* **2014**:bau025. doi:10.1093/database/bau025
- 713 Maldonado M del M, Dharmawardhane S. 2018. Targeting Rac and Cdc42 GTPases in Cancer.  
714 *Cancer Res* **78**:3101--3111. doi:10.1158/0008-5472.CAN-18-0619
- 715 McKinney W. 2010. Data Structures for Statistical Computing in Python.
- 716 Minguez P, Letunic I, Parca L, Bork P. 2013. PTMcode: a database of known and predicted  
717 functional associations between post-translational modifications in proteins. *Nucleic Acids*  
718 *Res* **41**:D306-11. doi:10.1093/nar/gks1230
- 719 Minguez P, Letunic I, Parca L, Garcia-Alonso L, Dopazo J, Huerta-Cepas J, Bork P. 2015.  
720 PTMcode v2: a resource for functional associations of post-translational modifications  
721 within and between proteins. *Nucleic Acids Res* **43**:D494--502. doi:10.1093/nar/gku1081
- 722 Minguez P, Parca L, Diella F, Mende DR, Kumar R, Helmer-Citterich M, Gavin A-C, van Noort  
723 V, Bork P. 2012. Deciphering a global network of functionally associated post-translational  
724 modifications. *Mol Syst Biol* **8**:599. doi:10.1038/msb.2012.31
- 725 Mitchell A, Chang H, Daugherty L, Fraser M, Hunter S, Lopez R, Mcanulla C, Mcmenamin C,  
726 Nuka G, Pesseat S, Sangrador-vegas A, Scheremetjew M, Rato C, Yong S, Bateman A,  
727 Punta M, Attwood TK, Sigrist CJ a., Redaschi N, Rivoire C, Xenarios I, Kahn D, Guyot D,  
728 Bork P, Letunic I, Gough J, Oates M, Haft D, Huang H, Natale D a., Wu CH, Orengo C,  
729 Sillitoe I, Mi H, Thomas PD, Finn RD. 2015. The InterPro protein families database : the  
730 classification resource after 15 years. *Nucleic Acids Res* **43**:D213--D221.  
731 doi:10.1093/nar/gku1243
- 732 Mukherjee K, English N, Meers C, Kim H, Jonke A, Storici F, Torres M. 2019. Systematic  
733 analysis of linker histone PTM hotspots reveals phosphorylation sites that modulate  
734 homologous recombination and DSB repair. *DNA Repair (Amst)* **86**:102763.

- 735 doi:10.1016/j.dnarep.2019.102763
- 736 Ochoa D, Jarnuczak AF, Gehre M, Soucheray M, Kleefeldt AA, Vieitez C, Hill A, Garcia-Alonso  
737 L, Swaney DL, Vizcaino JAA, Noh K-M, Beltrao P. 2019. The functional landscape of the  
738 human phosphoproteome. *bioRxiv* 541656. doi:10.1101/541656
- 739 Ochoa D, Jarnuczak AF, Viéitez C, Gehre M, Soucheray M, Mateus A, Kleefeldt AA, Hill A,  
740 Garcia-Alonso L, Stein F, Krogan NJ, Savitski MM, Swaney DL, Vizcaíno JA, Noh K-M,  
741 Beltrao P. 2020. The functional landscape of the human phosphoproteome. *Nat Biotechnol*  
742 **38**:365–373. doi:10.1038/s41587-019-0344-3
- 743 Pascovici D, Wu JX, McKay MJ, Joseph C, Noor Z, Kamath K, Wu Y, Ranganathan S, Gupta V,  
744 Mirzaei M. 2018. Clinically Relevant Post-Translational Modification Analyses-Maturing  
745 Workflows and Bioinformatics Tools. *Int J Mol Sci* **20**. doi:10.3390/ijms20010016
- 746 Prabakaran S, Lippens G, Steen H, Gunawardena J. 2012. Post-translational modification:  
747 Nature's escape from genetic imprisonment and the basis for dynamic information  
748 encoding. *Wiley Interdiscip Rev Syst Biol Med*. doi:10.1002/wsbm.1185
- 749 R Core Team. 2013. R: A language and environment for statistical computing.
- 750 Reimand J, Bader GD. 2014. Systematic analysis of somatic mutations in phosphorylation  
751 signaling predicts novel cancer drivers. *Mol Syst Biol* **9**:637–637. doi:10.1038/msb.2012.68
- 752 Reimand J, Wagih O, Bader GD. 2015. Evolutionary constraint and disease associations of  
753 post-translational modification sites in human genomes. *PLoS Genet* **11**:e1004919.  
754 doi:10.1371/journal.pgen.1004919
- 755 Strumillo MJ, Oplova M, Vieitez C, Ochoa D, Shahrzad M, Busby BP, Sopko R, Studer RA,  
756 Perrimon N, Panse VG, Beltrao P. 2018. Conserved phosphorylation hotspots in eukaryotic  
757 protein domain families. *bioRxiv* 391185. doi:10.1101/391185
- 758 Strumillo MJ, Oplová M, Viéitez C, Ochoa D, Shahrzad M, Busby BP, Sopko R, Studer RA,  
759 Perrimon N, Panse VG, Beltrao P. 2019. Conserved phosphorylation hotspots in eukaryotic  
760 protein domain families. *Nat Commun* **10**:1977. doi:10.1038/s41467-019-09952-x
- 761 Torres M. 2016. Chapter Two - Heterotrimeric G Protein Ubiquitination as a Regulator of G  
762 Protein Signaling Progress in Molecular Biology and Translational Science. pp. 57–83.  
763 doi:10.1016/bs.pmbts.2016.03.001
- 764 Torres MP, Dewhurst H, Sundararaman N. 2016. Proteome-wide Structural Analysis of PTM  
765 Hotspots Reveals Regulatory Elements Predicted to Impact Biological Function and  
766 Disease. *Mol Cell Proteomics* **15**:3513–3528. doi:10.1074/mcp.M116.062331
- 767 Xiao Q, Miao B, Bi J, Wang Z, Li Y. 2016. Prioritizing functional phosphorylation sites based on  
768 multiple feature integration. *Sci Rep* **6**:24735. doi:10.1038/srep24735
- 769 You E. n.d. VueJs.
- 770

## **SAPH-ire TFx – A Recommendation-based Machine Learning Model Captures a Broad Feature Landscape Underlying Functional Post-Translational Modifications**

Nolan English<sup>1,2</sup> and Matthew Torres<sup>1,2,\*</sup>

### **SUPPLEMENTAL TABLES AND FIGURES**

*Supplemental tables can be found as individual tabs in the supplemental excel file.*

**Table S1.** Frequency of PTM types analyzed by SAPH-ire TFx.

**Table S2.** List of InterPro families analyzed in SAPH-ire TFx.

**Table S3.** List of organisms represented by SAPH-ire TFx.

**Table S4.** Description of features used in the SAPH-ire TFx model.

**Table S5.** List of PTMs that intersect between SAPH-ire TFx, ELM, and Clinvar.

**Table S6.** GO enrichment analysis of 221 TFx-recommended PTMs from Table S5.



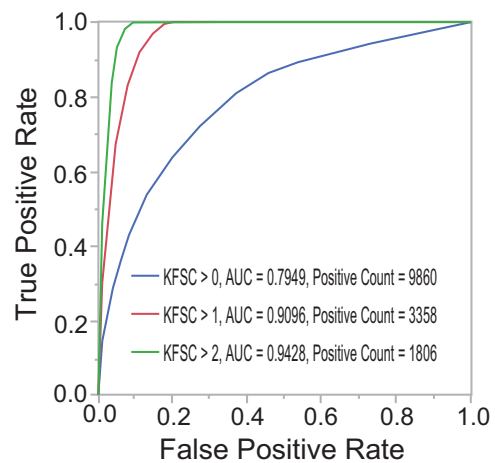

**Figure S1. ROC curves at different KFSC thresholds.** (unfurled in Figure 1E).



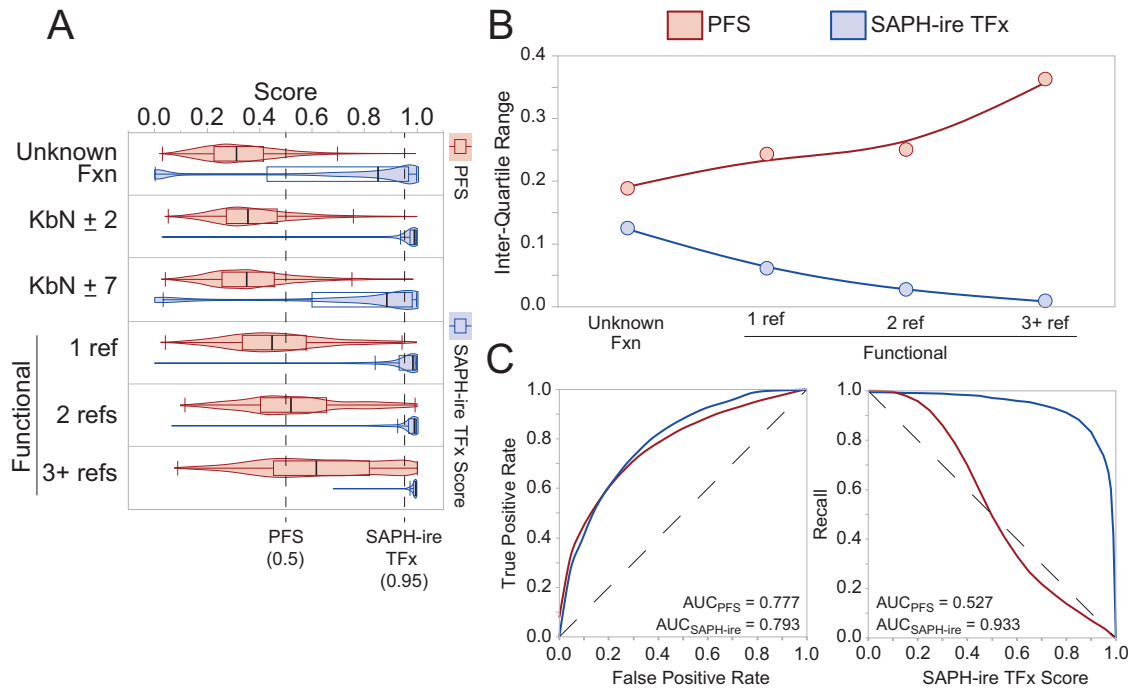

**Figure S2. Pairwise comparison between SAPH-ire TFx and the PFS machine learning models.** These data include 49,935 phosphosites that overlap between the SAPH-ire TFx and PFS datasets. (A) Score distribution relative to functional status. (B) Inter-quartile ranges from the distributions in A. (C). ROC and recall curves for the score comparison of each model.

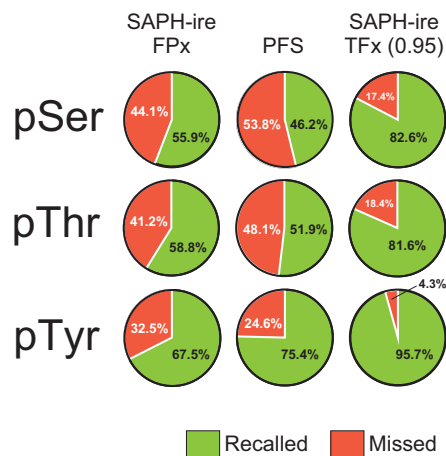

**Figure S3. Recall performance improvements observed with SAPH-ire TFx are independent of whether the site is serine, threonine or tyrosine.** A total of 24,695 phosphosites that overlap between S-PFx, PFS, and SAPH-ire TFx were parsed by site identity and the percent recalled or missed tallied based on model-specific thresholds indicated in Figure 4.

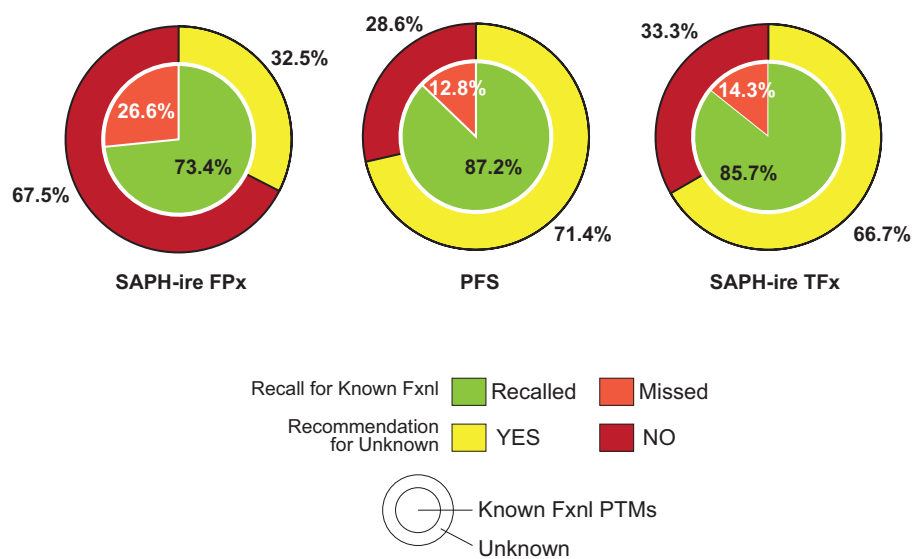

**Figure S4. Model recall and recommendation comparison for PTMs associated with validated functional SLiMs from the ELM resource.**

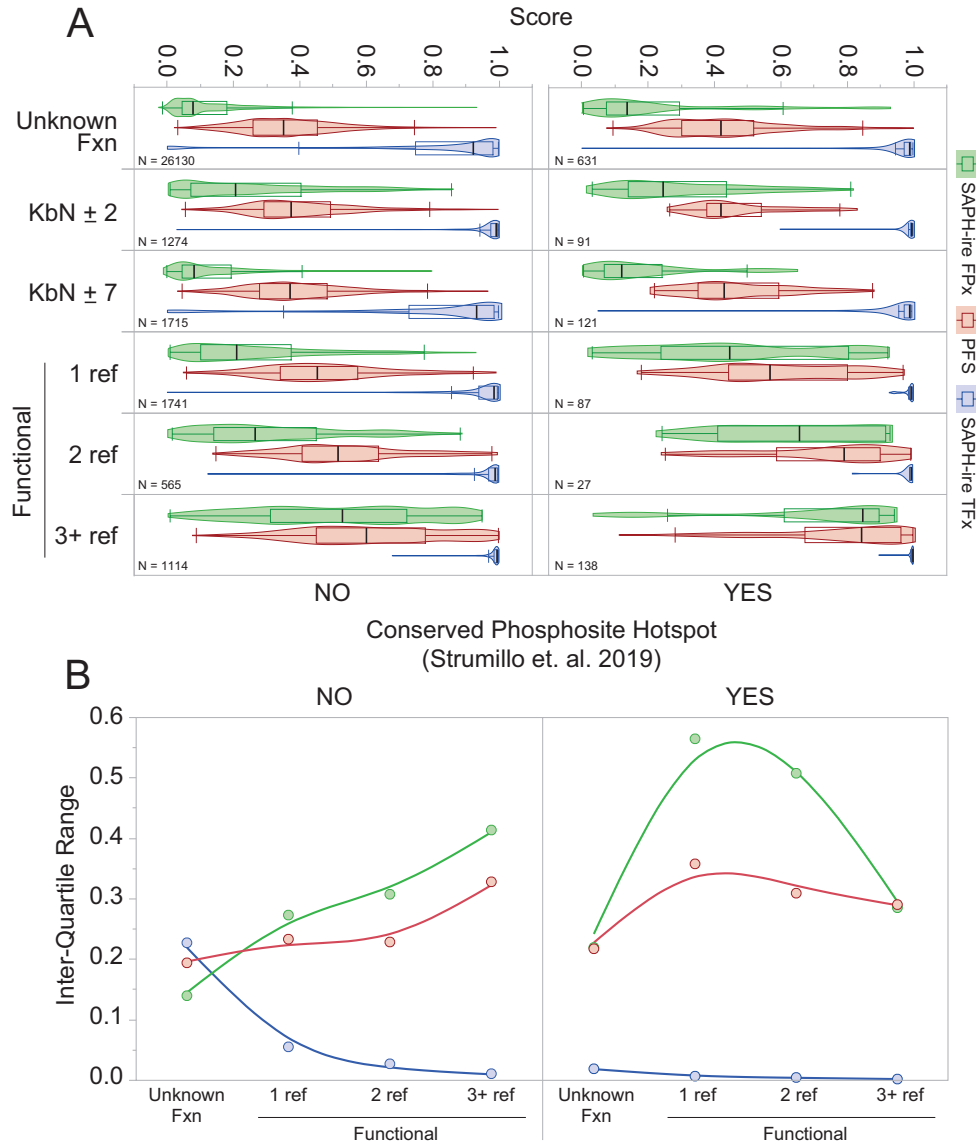

**Figure S5. Comparison of SAPH-ire FPx, PFS, and SAPH-ire TFx models relative to phosphosite conservation hotspot analysis.** Phosphosites localized within conserve phosphosite hotspots predicted by Strumillo et al. were used to bin data from the three-model comparison shown in figure 5. (A) Score distribution relative to functional status relative to predicted hotspots. (B) Inter-quartile ranges from the distributions in A.

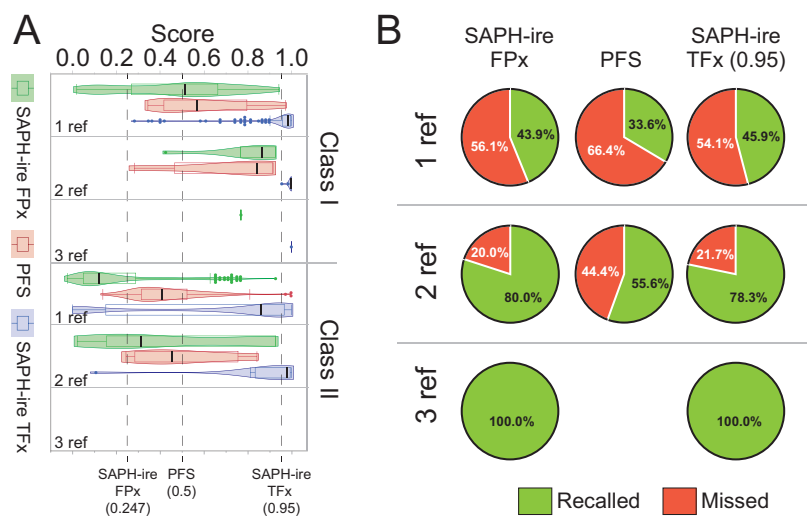

**Figure S6. Model comparison for Class I and II newly curated functional phosphosites.** (A) Model score distributions for Class I and II newly curated functional PTMs (see figure 4A). “1, 2, 3 refs” refers to number of PMIDs associated with the new data only (not the data from the original analysis of the extended dataset). (B) Recall rates for each model is shown relative to number of references supporting functionality of the PTM from A (KFSC = 1, 2, 3 ref).
